# Supplementary material for: Spray drying construction of hierarchical hollow ZnMn2O4 folded microspheres as anode materials for lithium ion batteries
Source: Royal Society of Chemistry journal article supplement (doi:10.1039/d2ma00924b), 2022-01-01
Supplement: d2ma00924b1.pdf [file d2ma00924b1.pdf]

**Spray drying construction of hierarchical hollow  $\text{ZnMn}_2\text{O}_4$  folded microspheres  
as anode materials for lithium ion batteries**

Yamin Zhang,<sup>†</sup> Senyang Xu,<sup>†</sup> Yuyan Wang, Linrui Hou\*, Changzhou Yuan\*

School of Materials Science & Engineering, University of Jinan, Jinan, 250022, P. R.

China

E-mail: [mse\\_houlr@ujn.edu.cn](mailto:mse_houlr@ujn.edu.cn) (*Prof. L. R. Hou*)

[mse\\_yuancz@ujn.edu.cn](mailto:mse_yuancz@ujn.edu.cn); [ayuancz@163.com](mailto:ayuancz@163.com) (*Prof. C. Z. Yuan*)

<sup>†</sup>Theses authors contributed equally to this work

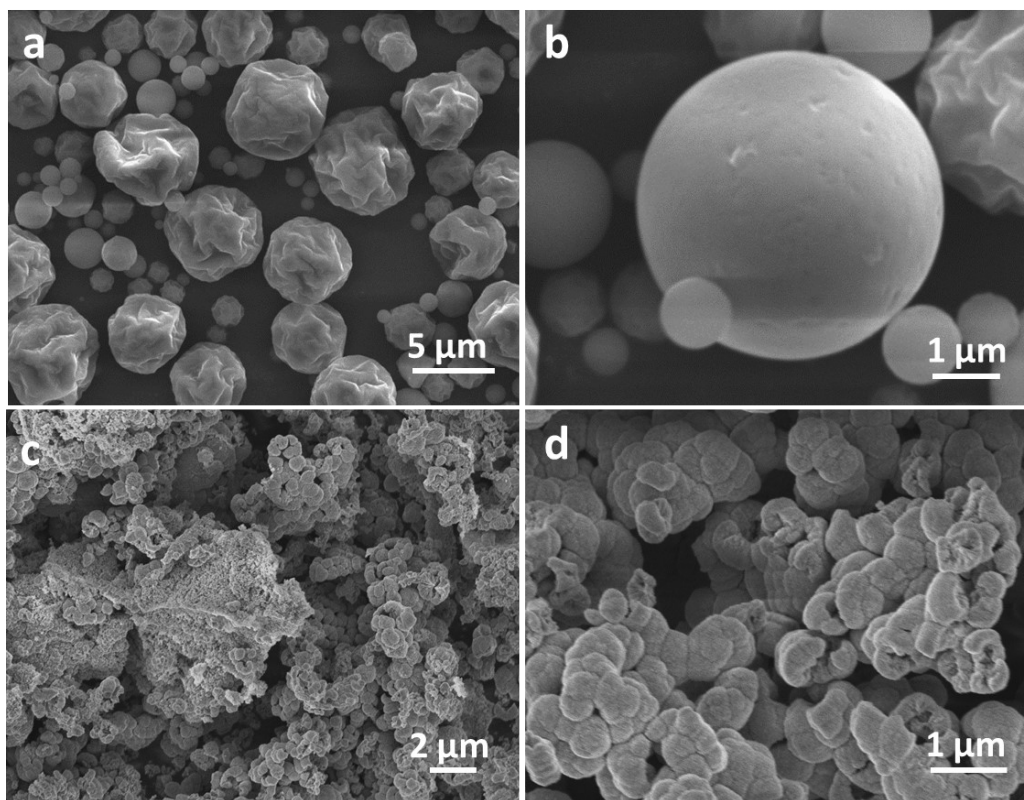

**Figure S1.** (a,b) FESEM images of the ZM-P, (c,d) FESEM images of the ZZMO.

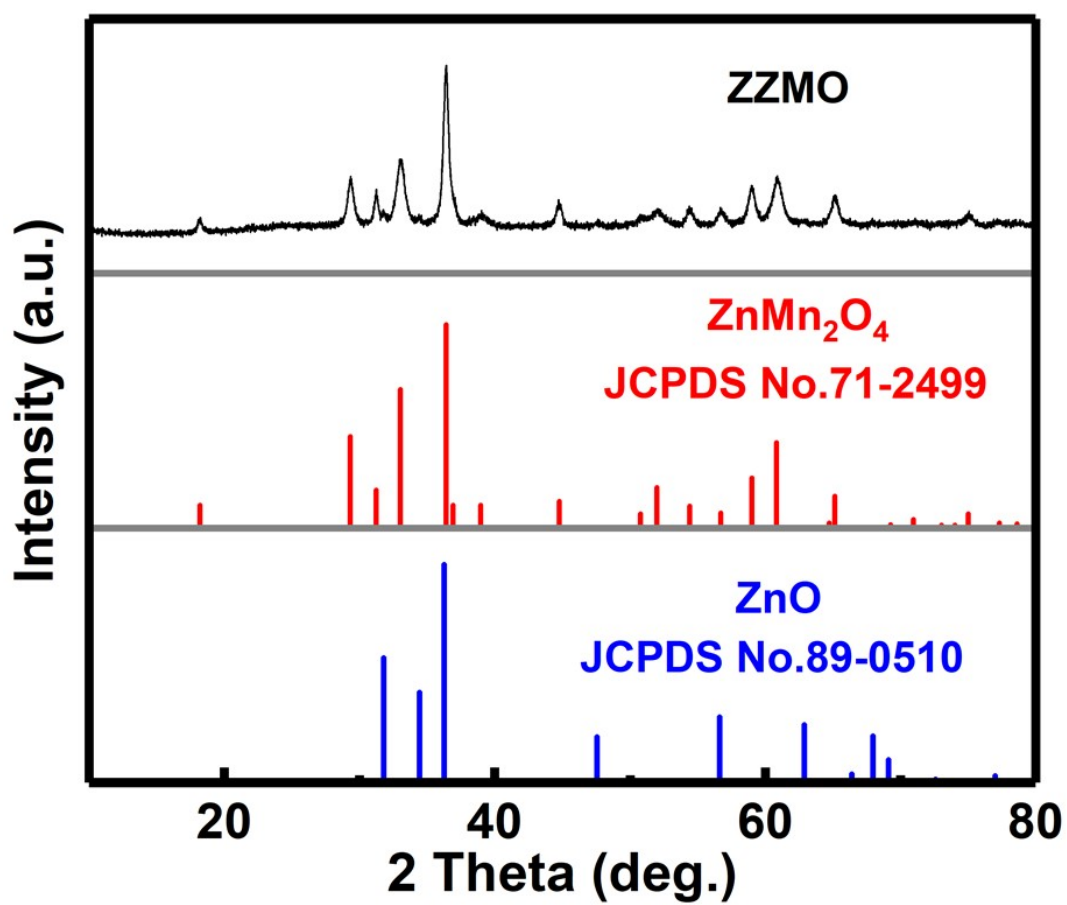

Figure S2. XRD patterns of the ZZMO.

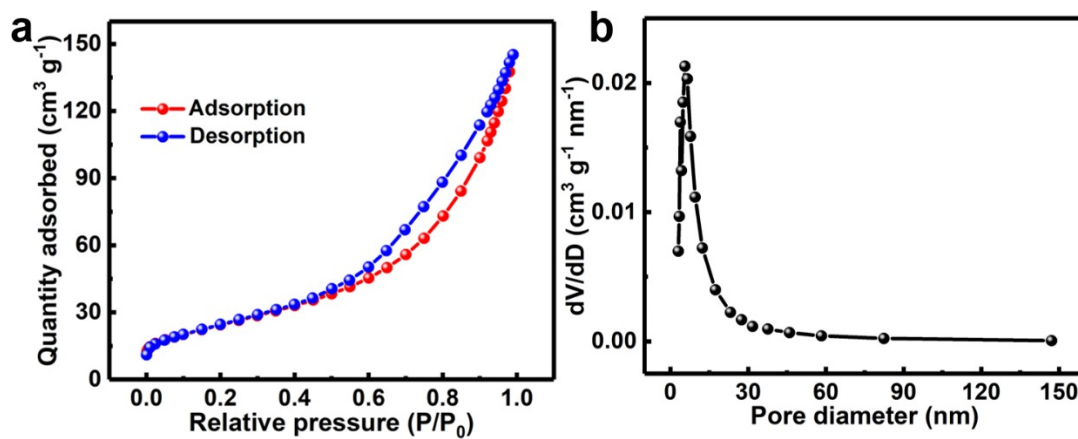

Figure S3. (a) N<sub>2</sub> desorption curve, (b) pore size distribution curve of the ZMO-HFS.

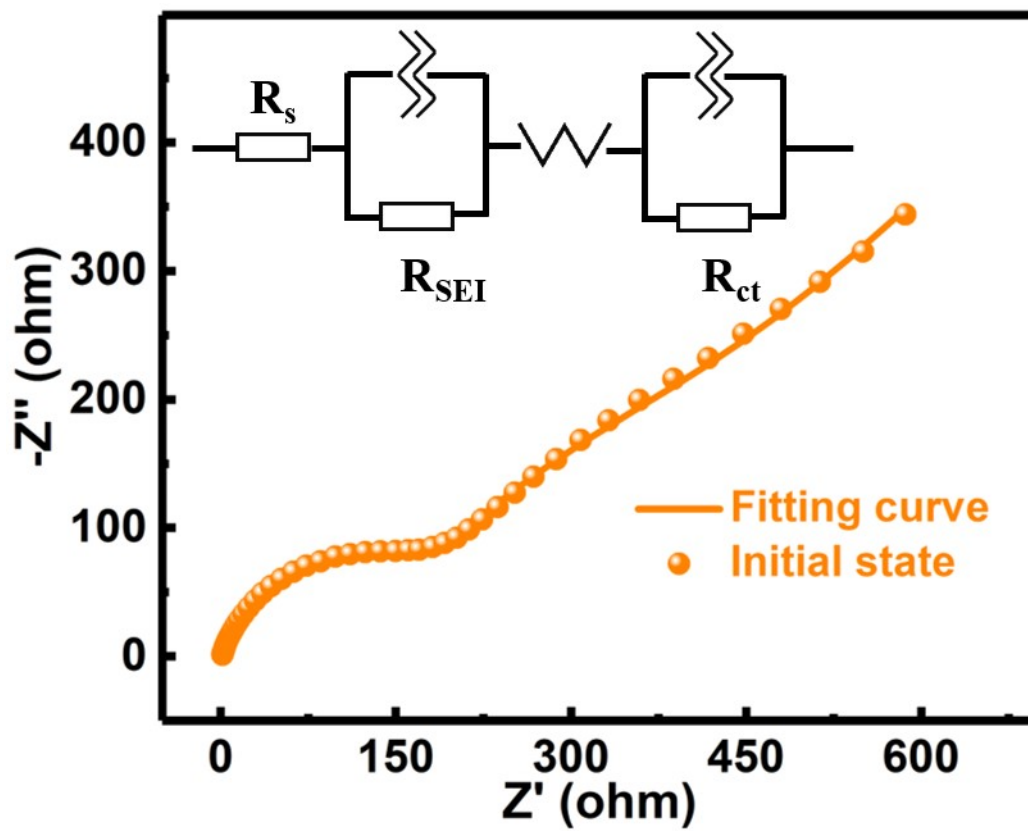

Figure S4. EIS and corresponding fitting curves of the ZMO-HFS electrode.
